# Supplementary material for: A novel ratiometric fluorescent probe based on a BODIPY derivative for Cu2+ detection in aqueous solution
Source: Royal Society of Chemistry journal article supplement (doi:10.1039/c8ay01760c), 2018-01-01
Supplement: c8ay01760c1.pdf [file c8ay01760c1.pdf]

## Supporting Information

### A novel ratiometric fluorescent probe based on BODIPY derivative for

### Cu<sup>2+</sup> detection in aqueous solution

Tingting Shu<sup>a</sup>, Zhihui Yang<sup>a</sup>, Zhiting Cen<sup>a</sup>, Xuankai Deng<sup>b</sup>, Yun Deng<sup>a</sup>, Changzhi Dong<sup>a,c</sup>, Yanhua Yu<sup>a,\*</sup>

a. Institute for Interdisciplinary Research, Jiangnan University, Wuhan 430056, China; E-mail: hpyyh@aliyun.com.

b. Institute of Wuhan Studies, Jiangnan University, Wuhan 430056, China.

c. University Paris Diderot, Sorbonne Paris Cité, ITODYS, UMR CNRS 7086, 15 rue J-A de Baïf, 75205 Paris Cedex 13, France.

## Contents

1. Measurement of fluorescence quantum yields
2. <sup>1</sup>H NMR, <sup>13</sup>C NMR and HRMS copies of probe 1 and Compound 2
- 3 The absorption and fluorescence spectra of Compound 2 and 1-Cu<sup>2+</sup>
- 4 <sup>1</sup>H NMR of 1-Cu<sup>2+</sup> and Compound 2
5. The MS spectra of 1-Cu<sup>2+</sup>

## 1 Measurement of fluorescence quantum yields

The fluorescence quantum ( $\Phi_F$ ) was calculated using the following equation 1.

$$\Phi_{unk} = \Phi_{std} \frac{(I_{unk} / A_{unk})}{(I_{std} / A_{std})} \left( \frac{n_{unk}}{n_{std}} \right)^2 \quad \text{eq. 1}$$

Where  $\Phi_{unk}$  and  $\Phi_{std}$  are the quantum yield of the sample and standard,  $I_{unk}$  and  $I_{std}$  are the integrated emission intensity of the corrected spectra of the sample and standard,  $A_{unk}$  and  $A_{std}$  are the absorbance of the sample and standard at the excitation wavelength (lower than 0.05), and  $n$  is the refractive index of the solvent used for the two solutions. The standard reference compound used for the determination of  $\Phi_F$  was Rhodamine 6 G in EtOH ( $\Phi_{std} = 0.95$ ).

## 2. $^1\text{H}$ NMR, $^{13}\text{C}$ NMR and HRMS copies of probe 1 and Compound 2

### $^1\text{H}$ NMR of probe 1

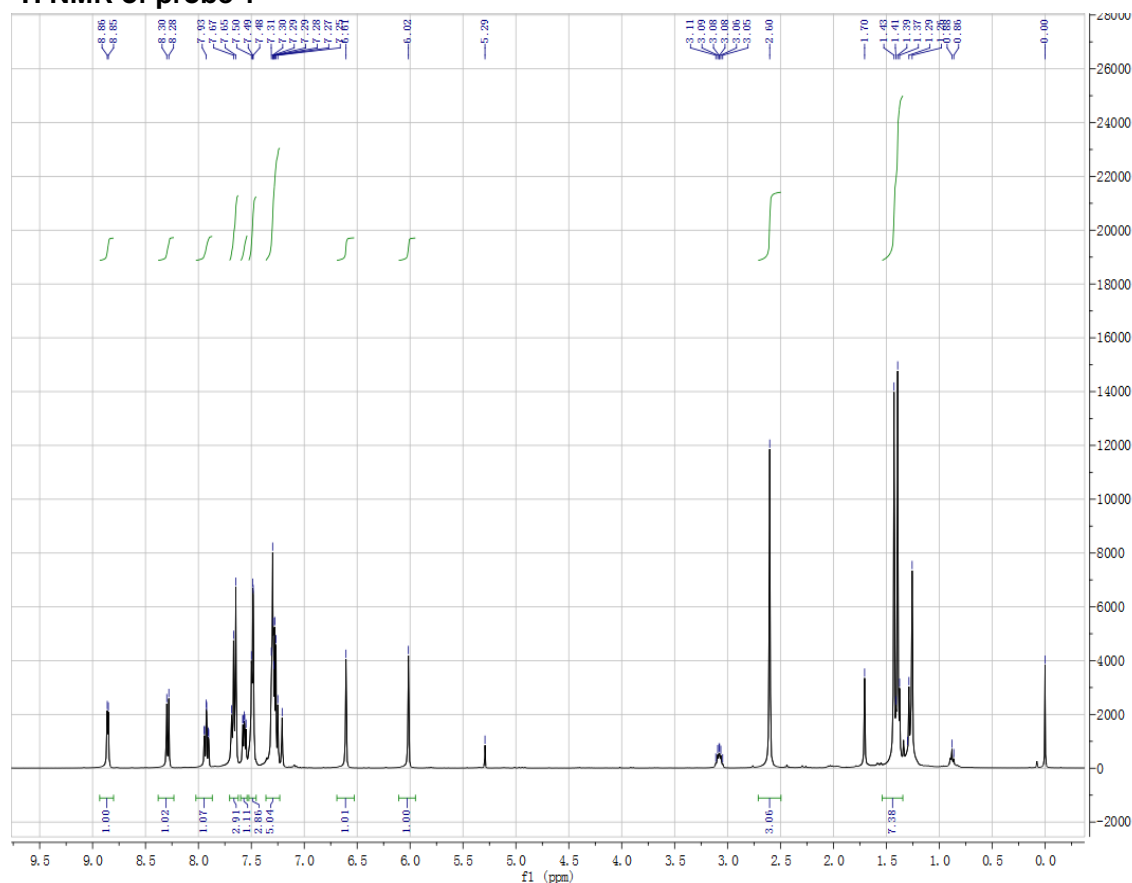

### $^{13}\text{C}$ NMR of probe 1

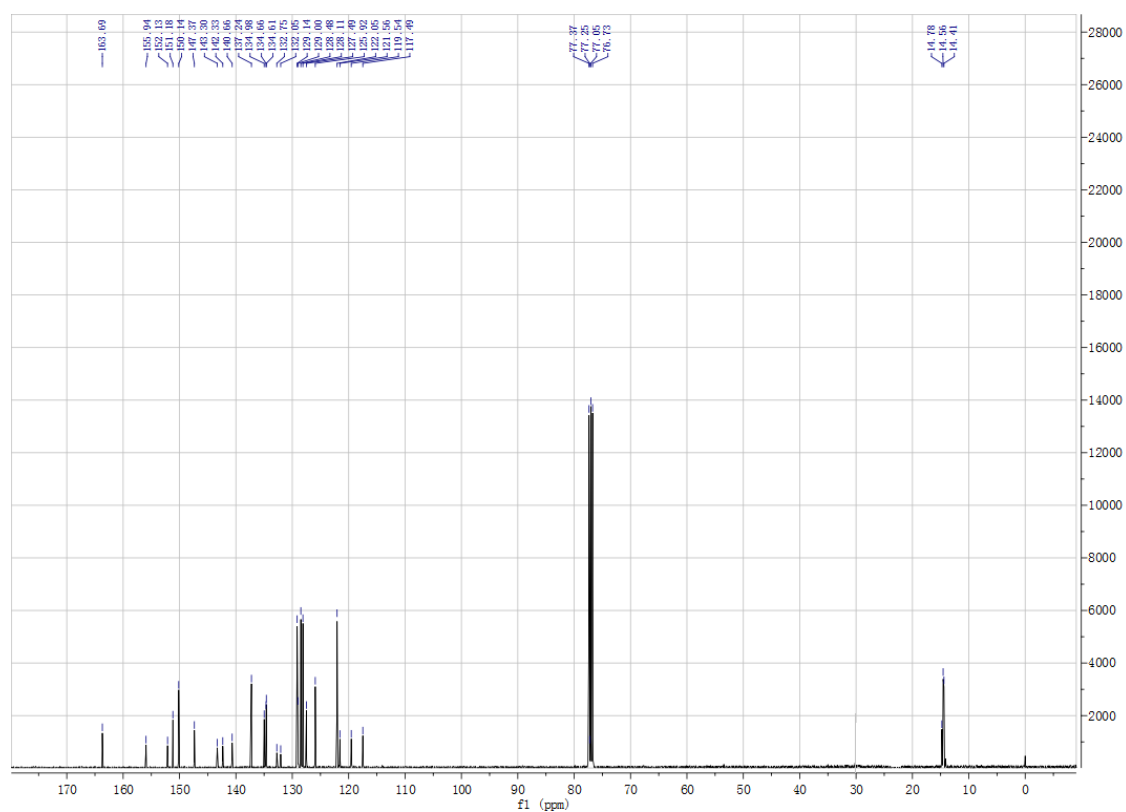

HRMS of probe 1

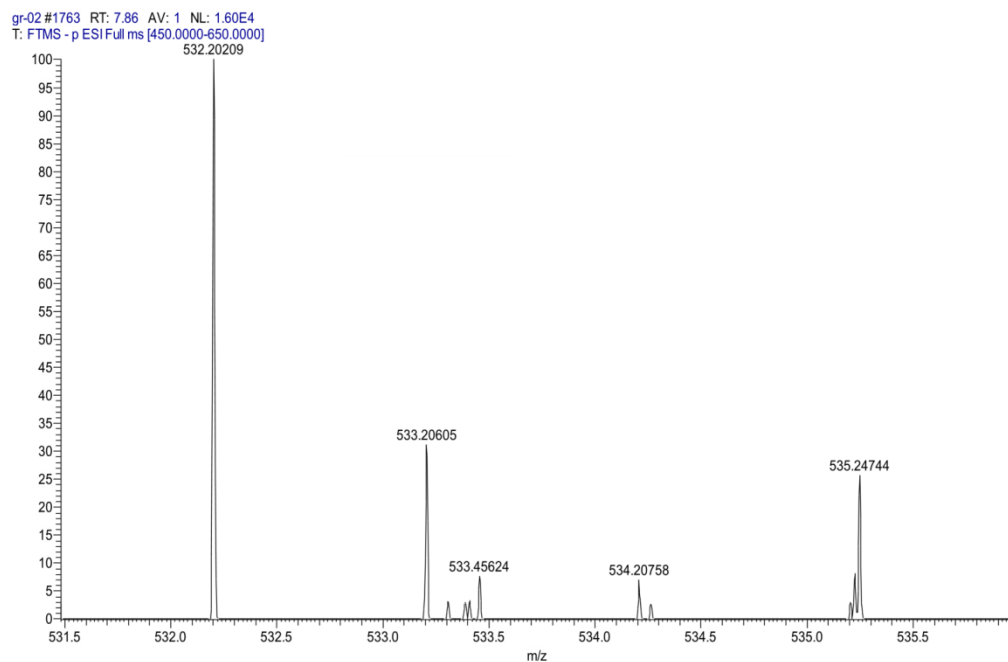

# **<sup>1</sup>H NMR of compound 2**

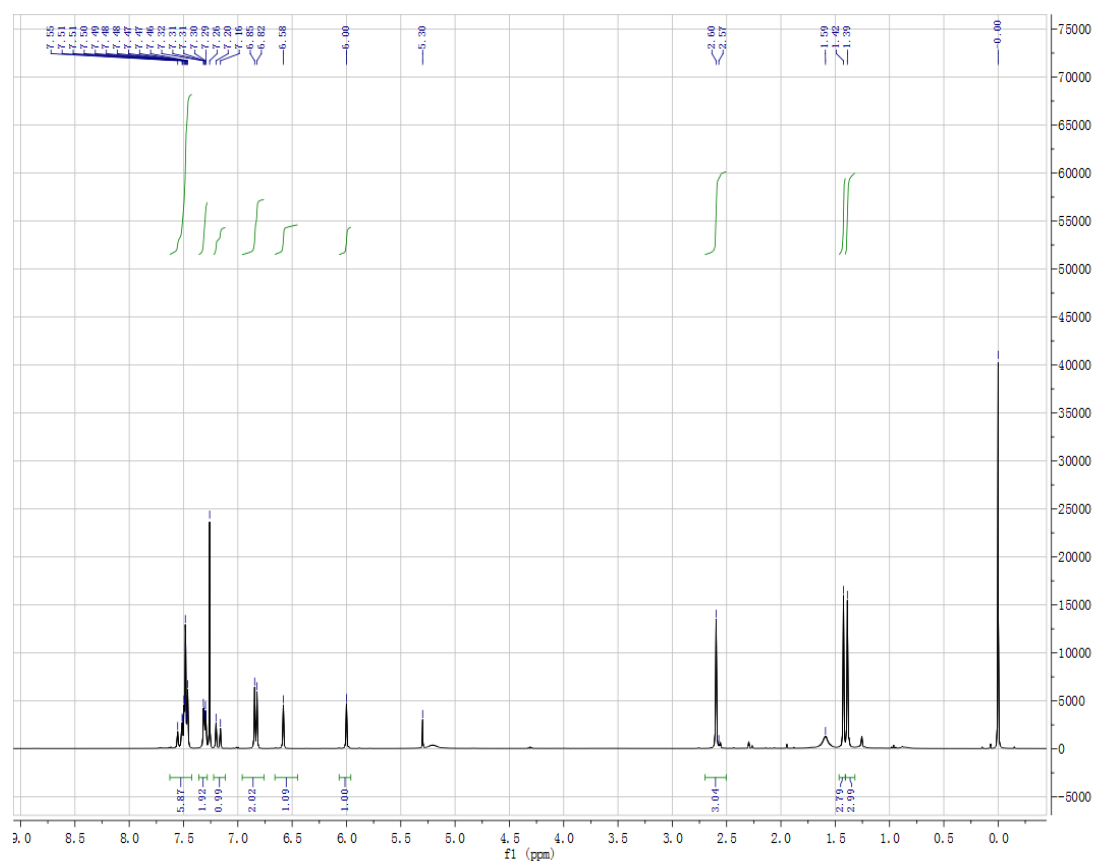

# **<sup>13</sup>C NMR of compound 2**

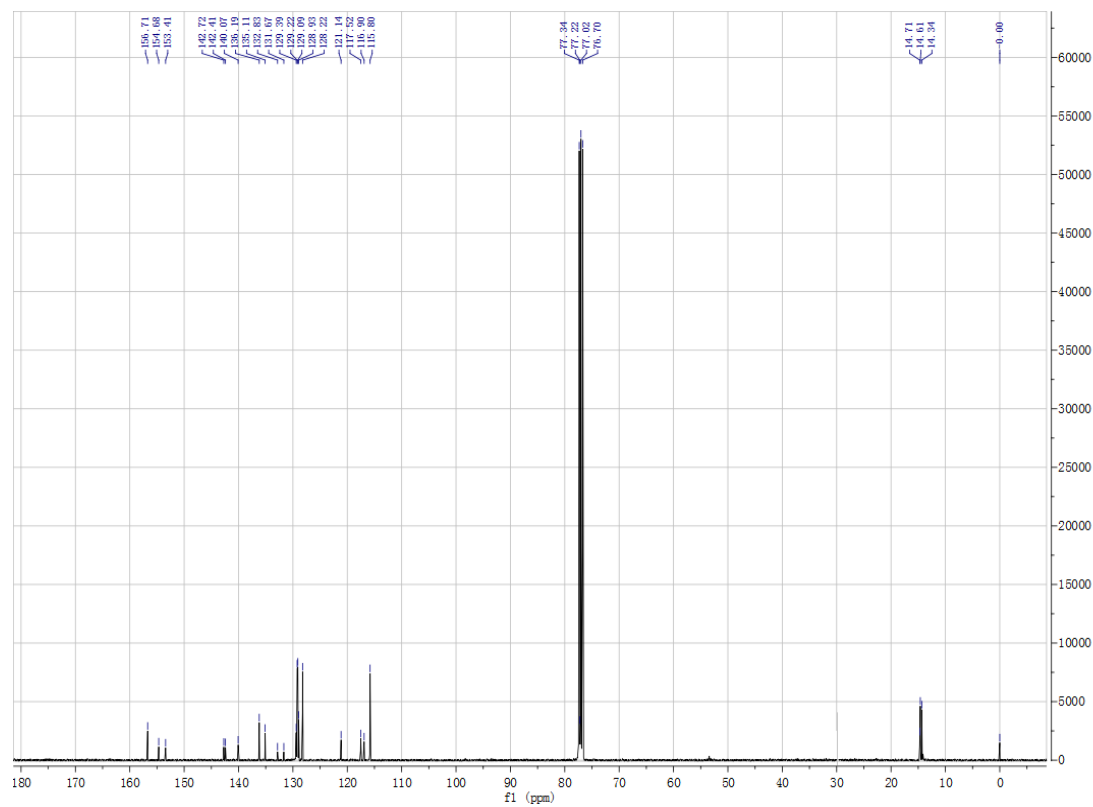

## HRMS of compound 2

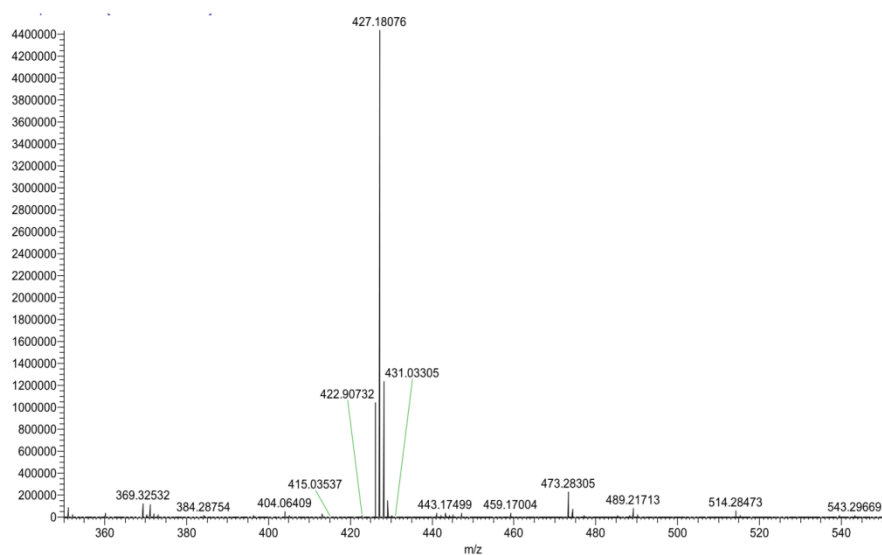

## 3 The absorption and fluorescence spectra of Compound 2 and 1-Cu<sup>2+</sup>

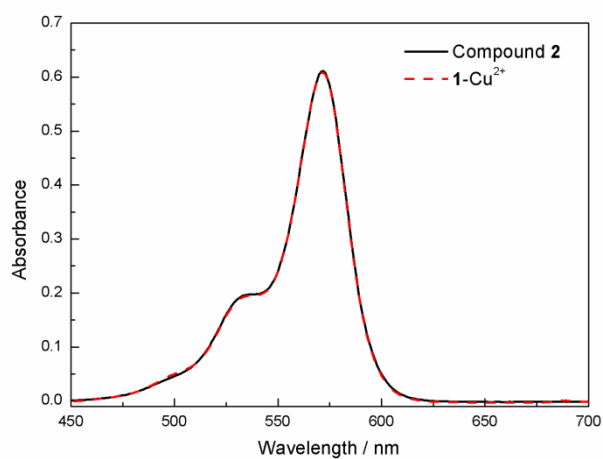

**Fig.S1** Absorption spectra of compound **2** and the isolated product **1-Cu<sup>2+</sup>** in the buffer solution (0.02 M HEPES, 50% DMSO, pH = 7.2).

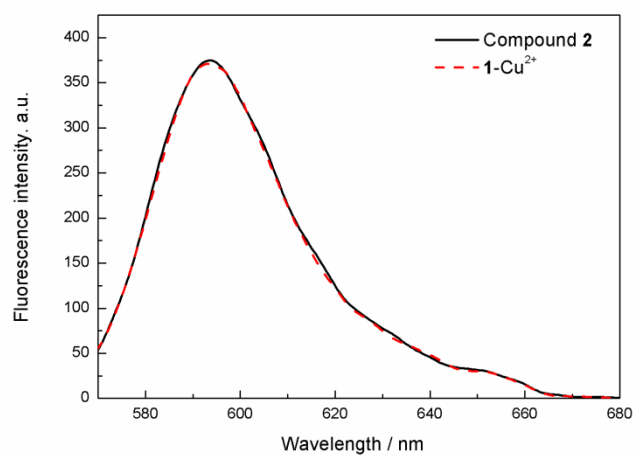

**Fig.S2** Fluorescence spectra of compound **2** and the isolated product **1-Cu<sup>2+</sup>** in the buffer solution (0.02 M HEPES, 50% DMSO, pH = 7.2).

#### 4 <sup>1</sup>H NMR of **1-Cu<sup>2+</sup>** and Compound **2**

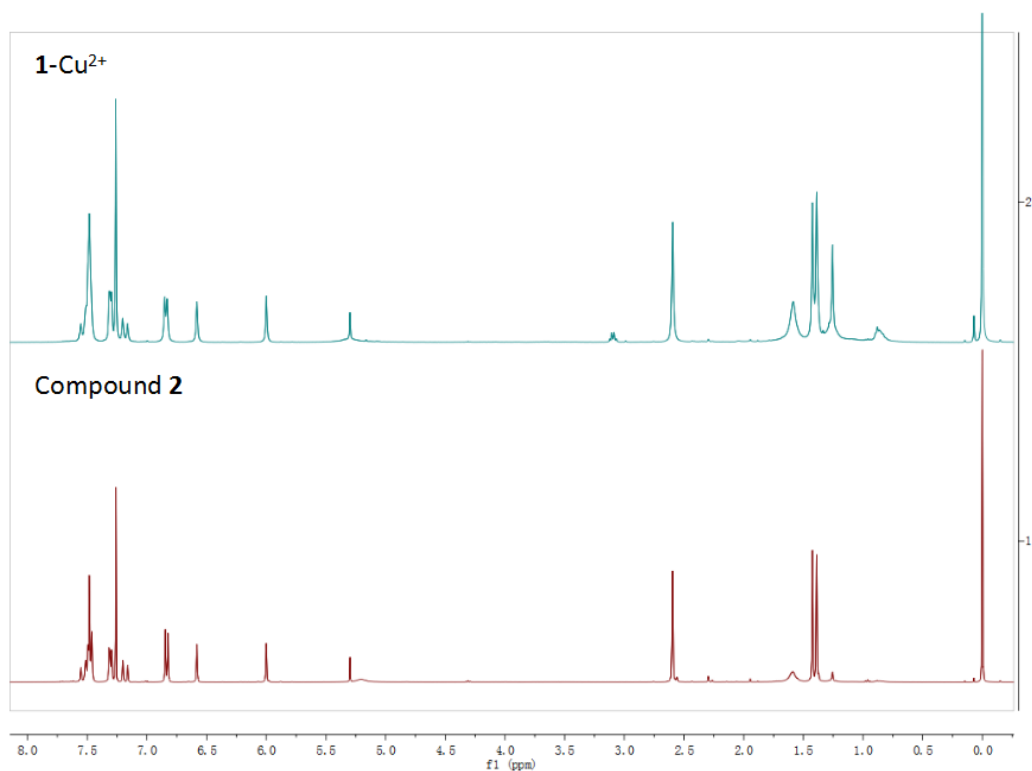

**Fig.S3** <sup>1</sup>H NMR of **1-Cu<sup>2+</sup>** and Compound **2**

## 5. The MS spectra of 1 – CN adduct

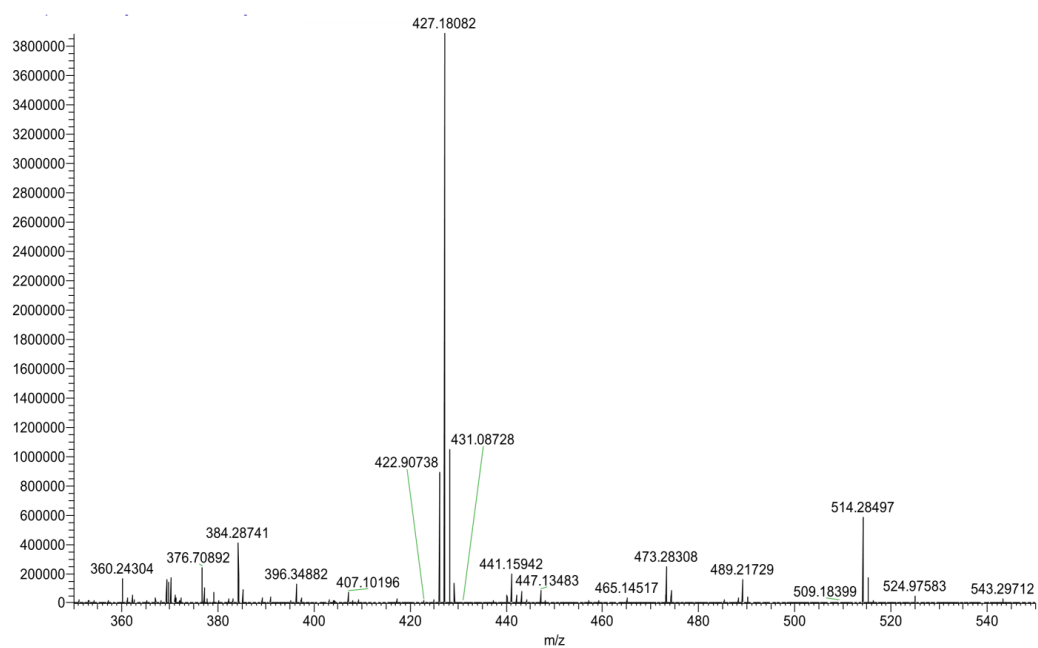

Fig.S4 The MS spectra of 1 – CN adduct
